# Supplementary material for: Alteration of Gene Expression Profile in Niemann-Pick Type C Mice Correlates with Tissue Damage and Oxidative Stress
Source: PLoS One. 2011 Dec 22;6(12):e28777. doi: 10.1371/journal.pone.0028777 (PMC3245218; doi:10.1371/journal.pone.0028777)
Supplement: Table S5 — Differentially expressed genes in the liver grouped by GO categories (XLS) [file pone.0028777.s008.xls]

## Sheet: Enriched GO Upregulated
Table S5. Differentially expressed genes in the liver grouped by GO categories
Up regulated genes
GO categories	Name	Gene Symbol	Product
cell adhesion (n=19)
	NM_008495	Lgals1	Galectin-1 (Lectin galactoside-binding soluble 1)(Beta-galactoside-binding lectin L-14-I)(Lactose-binding lectin 1)(S-Lac lectin 1)(Galaptin)(14 kDa lectin) [Source:UniProtKB/Swiss-Prot;Acc:P16045]
	NM_133833	Dst	Bullous pemphigoid antigen 1, isoform 5 (BPA)(Hemidesmosomal plaque protein)(Dystonia musculorum protein)(Dystonin) [Source:UniProtKB/Swiss-Prot;Acc:Q91ZU8]
	NM_019549	Plek	Pleckstrin [Source:UniProtKB/Swiss-Prot;Acc:Q9JHK5]
	NM_010330	Emb	Embigin Precursor (Teratocarcinoma glycoprotein Gp-70) [Source:UniProtKB/Swiss-Prot;Acc:P21995]
	NM_145732	Ctnna2	Catenin alpha-2 (Alpha-catenin-related protein)(Alpha N-catenin) [Source:UniProtKB/Swiss-Prot;Acc:Q61301]
	NM_031163	Col2a1	Collagen alpha-1(II) chain Precursor (Alpha-1 type II collagen) [Contains Chondrocalcin] [Source:UniProtKB/Swiss-Prot;Acc:P28481]
	NM_020008	Clec7a	C-type lectin domain family 7 member A (Dendritic cell-associated C-type lectin 1)(DC-associated C-type lectin 1)(Dectin-1)(Beta-glucan receptor)(C-type lectin superfamily member 12) [Source:UniProtKB/Swiss-Prot;Acc:Q6QLQ4]
	NM_019815	Cldn18	Claudin-18 [Source:UniProtKB/Swiss-Prot;Acc:P56857]
	NM_178748	Egflam	Pikachurin Precursor (EGF-like, fibronectin type-III and laminin G-like domain-containing protein)(Nectican) [Source:UniProtKB/Swiss-Prot;Acc:Q4VBE4]
	NM_020265	Dkk2	Dickkopf-related protein 2 Precursor (Dickkopf-2)(Dkk-2)(mDkk-2) [Source:UniProtKB/Swiss-Prot;Acc:Q9QYZ8]
	NM_010651	Klra8	Killer cell lectin-like receptor 8 (T-cell surface glycoprotein Ly-49H)(Lymphocyte antigen 49h)(Ly-49h) [Source:UniProtKB/Swiss-Prot;Acc:Q60682]
	NM_009367	Tgfb2	Transforming growth factor beta-2 Precursor (TGF-beta-2) [Source:UniProtKB/Swiss-Prot;Acc:P27090]
	NM_009851	Cd44	CD44 antigen Precursor (Phagocytic glycoprotein 1)(PGP-I)(PGP-1)(HUTCH-I)(Extracellular matrix receptor III)(ECMR-III)(GP90 lymphocyte homing/adhesion receptor)(Hermes antigen)(Hyaluronate receptor)(Lymphocyte antigen 24)(Ly-24)(CD44 antigen) [Source:UniProtKB/Swiss-Prot;Acc:P15379]
	NM_007643	Cd36	Platelet glycoprotein 4 (Platelet glycoprotein IV)(GPIV)(GPIIIB)(PAS IV)(PAS-4)(CD36 antigen) [Source:UniProtKB/Swiss-Prot;Acc:Q08857]
	NM_019456	Apbb1ip	Amyloid beta A4 precursor protein-binding family B member 1-interacting protein (APBB1-interacting protein 1)(Proline-rich EVH1 ligand 1)(PREL-1)(Proline-rich protein 48) [Source:UniProtKB/Swiss-Prot;Acc:Q8R5A3]
	NM_172612	Rnd1	Rho-related GTP-binding protein Rho6 Precursor (Rho family GTPase 1)(Rnd1) [Source:UniProtKB/Swiss-Prot;Acc:Q8BLR7]
	NM_021334	Itgax	Integrin alpha-X Precursor (Leukocyte adhesion glycoprotein p150,95 alpha chain)(Leukocyte adhesion receptor p150,95)(CD11 antigen-like family member C)(CD11c antigen) [Source:UniProtKB/Swiss-Prot;Acc:Q9QXH4]
	NM_053110	Gpnmb	Transmembrane glycoprotein NMB Precursor (Dendritic cell-associated transmembrane protein)(DC-HIL) [Source:UniProtKB/Swiss-Prot;Acc:Q99P91]
	NM_011693	Vcam1	Vascular cell adhesion protein 1 Precursor (V-CAM 1)(CD106 antigen) [Source:UniProtKB/Swiss-Prot;Acc:P29533]
alkane 1-monooxygenase activity (n=2)
	NM_010011	Cyp4a10	Cytochrome P450 4A10 (CYPIVA10)(Lauric acid omega-hydroxylase)(EC 1.14.15.3)(P450-LA-omega 1)(P452) [Source:UniProtKB/Swiss-Prot;Acc:O88833]
	NM_007822	Cyp4a14	Cytochrome P450 4A14 Precursor (CYPIVA14)(Lauric acid omega-hydroxylase 3)(EC 1.14.15.3)(P450-LA-omega 3) [Source:UniProtKB/Swiss-Prot;Acc:O35728]
carbohydrate binding (n=12)
	NM_010705	Lgals3	Galectin-3 (Galactose-specific lectin 3)(Mac-2 antigen)(IgE-binding protein)(35 kDa lectin)(Carbohydrate-binding protein 35)(CBP 35)(Laminin-binding protein)(Lectin L-29)(L-34 galactoside-binding lectin) [Source:UniProtKB/Swiss-Prot;Acc:P16110]
	NM_011260	Reg3g	Regenerating islet-derived protein 3 gamma Precursor (Reg III-gamma)(Pancreatitis-associated protein 3) [Source:UniProtKB/Swiss-Prot;Acc:O09049]
	NM_178748	Egflam	Pikachurin Precursor (EGF-like, fibronectin type-III and laminin G-like domain-containing protein)(Nectican) [Source:UniProtKB/Swiss-Prot;Acc:Q4VBE4]
	NM_008495	Lgals1	Galectin-1 (Lectin galactoside-binding soluble 1)(Beta-galactoside-binding lectin L-14-I)(Lactose-binding lectin 1)(S-Lac lectin 1)(Galaptin)(14 kDa lectin) [Source:UniProtKB/Swiss-Prot;Acc:P16045]
	NM_010651	Klra8	Killer cell lectin-like receptor 8 (T-cell surface glycoprotein Ly-49H)(Lymphocyte antigen 49h)(Ly-49h) [Source:UniProtKB/Swiss-Prot;Acc:Q60682]
	NM_009851	Cd44	CD44 antigen Precursor (Phagocytic glycoprotein 1)(PGP-I)(PGP-1)(HUTCH-I)(Extracellular matrix receptor III)(ECMR-III)(GP90 lymphocyte homing/adhesion receptor)(Hermes antigen)(Hyaluronate receptor)(Lymphocyte antigen 24)(Ly-24)(CD44 antigen) [Source:UniProtKB/Swiss-Prot;Acc:P15379]
	NM_030678	Gys1	Glycogen [starch] synthase, muscle (EC 2.4.1.11) [Source:UniProtKB/Swiss-Prot;Acc:Q9Z1E4]
	NM_020008	Clec7a	C-type lectin domain family 7 member A (Dendritic cell-associated C-type lectin 1)(DC-associated C-type lectin 1)(Dectin-1)(Beta-glucan receptor)(C-type lectin superfamily member 12) [Source:UniProtKB/Swiss-Prot;Acc:Q6QLQ4]
	NM_172480	Mtrr	5-methyltetrahydrofolate-homocysteine methyltransferase reductase [Source:RefSeq peptide;Acc:NP_766068]
	NM_053110	Gpnmb	Transmembrane glycoprotein NMB Precursor (Dendritic cell-associated transmembrane protein)(DC-HIL) [Source:UniProtKB/Swiss-Prot;Acc:Q99P91]
	NM_147028	Olfr1125	olfactory receptor 1125 [Source:RefSeq peptide;Acc:NP_667239]
	NM_008509	Lpl	Lipoprotein lipase Precursor (LPL)(EC 3.1.1.34) [Source:UniProtKB/Swiss-Prot;Acc:P11152]
membrane part (n=8)
	NM_133833	Dst	Bullous pemphigoid antigen 1, isoform 5 (BPA)(Hemidesmosomal plaque protein)(Dystonia musculorum protein)(Dystonin) [Source:UniProtKB/Swiss-Prot;Acc:Q91ZU8]
	NM_009851	Cd44	CD44 antigen Precursor (Phagocytic glycoprotein 1)(PGP-I)(PGP-1)(HUTCH-I)(Extracellular matrix receptor III)(ECMR-III)(GP90 lymphocyte homing/adhesion receptor)(Hermes antigen)(Hyaluronate receptor)(Lymphocyte antigen 24)(Ly-24)(CD44 antigen) [Source:UniProtKB/Swiss-Prot;Acc:P15379]
	NM_145732	Ctnna2	Catenin alpha-2 (Alpha-catenin-related protein)(Alpha N-catenin) [Source:UniProtKB/Swiss-Prot;Acc:Q61301]
	NM_019456	Apbb1ip	Amyloid beta A4 precursor protein-binding family B member 1-interacting protein (APBB1-interacting protein 1)(Proline-rich EVH1 ligand 1)(PREL-1)(Proline-rich protein 48) [Source:UniProtKB/Swiss-Prot;Acc:Q8R5A3]
	NM_023735	Actr3	Actin-related protein 3 (Actin-like protein 3) [Source:UniProtKB/Swiss-Prot;Acc:Q99JY9]
	NM_009721	Atp1b1	Sodium/potassium-transporting ATPase subunit beta-1 (Sodium/potassium-dependent ATPase subunit beta-1) [Source:UniProtKB/Swiss-Prot;Acc:P14094]
	NM_145947	Slc26a7	Anion exchange transporter (Solute carrier family 26 member 7) [Source:UniProtKB/Swiss-Prot;Acc:Q8R2Z3]
	NM_010730	Anxa1	Annexin A1 (Annexin-1)(Annexin I)(Lipocortin I)(Calpactin II)(Chromobindin-9)(p35)(Phospholipase A2 inhibitory protein) [Source:UniProtKB/Swiss-Prot;Acc:P10107]
Down regulated genes
GO categories
membrane part (n=62)
	NM_033221	Ngfr	Tumor necrosis factor receptor superfamily member 16 Precursor (Low-affinity nerve growth factor receptor)(NGF receptor)(Low affinity neurotrophin receptor p75NTR)(CD271 antigen) [Source:UniProtKB/Swiss-Prot;Acc:Q9Z0W1]
	NM_177076	Relt	Tumor necrosis factor receptor superfamily member 19L Precursor [Source:UniProtKB/Swiss-Prot;Acc:Q8BX43]
	NM_146816	Olfr910	olfactory receptor 910 [Source:RefSeq peptide;Acc:NP_667022]
	NM_026066	Cmtm5	CKLF-like MARVEL transmembrane domain-containing protein 5 (Chemokine-like factor superfamily member 5) [Source:UniProtKB/Swiss-Prot;Acc:Q9D6G9]
	NM_146295	Olfr125	olfactory receptor 125 [Source:RefSeq peptide;Acc:NP_666402]
	NM_146547	Olfr11	Olfactory receptor 11 (Olfactory receptor 256-11)(Odorant receptor M49) [Source:UniProtKB/Swiss-Prot;Acc:Q60890]
	NM_053137	Pcdhb12	protocadherin beta 12 [Source:RefSeq peptide;Acc:NP_444367]
	NM_182993	Slc17a7	Vesicular glutamate transporter 1 (VGluT1)(Solute carrier family 17 member 7)(Brain-specific Na(+)-dependent inorganic phosphate cotransporter) [Source:UniProtKB/Swiss-Prot;Acc:Q3TXX4]
	NM_181321	Tmc6	Transmembrane channel-like protein 6 [Source:UniProtKB/Swiss-Prot;Acc:Q7TN60]
	NM_013664	Sema5b	Semaphorin-5B Precursor (Semaphorin-G)(Sema G) [Source:UniProtKB/Swiss-Prot;Acc:Q60519]
	NM_033509	Vangl2	Vang-like protein 2 (Van Gogh-like protein 2)(Loop-tail-associated protein)(Loop-tail protein 1) [Source:UniProtKB/Swiss-Prot;Acc:Q91ZD4]
	NM_134250	V1ri10	vomeronasal 1 receptor, I10 [Source:RefSeq peptide;Acc:NP_599006]
	NM_207542	Mrgprb3	Mas-related G-protein coupled receptor member B3 [Source:UniProtKB/Swiss-Prot;Acc:Q91ZC1]
	NM_146887	Olfr874	olfactory receptor 874 [Source:RefSeq peptide;Acc:NP_667093]
	NM_146370	Olfr1094	Olfactory receptor 1094 (Olfactory receptor 179-7) [Source:UniProtKB/Swiss-Prot;Acc:Q8VF13]
	NM_146975	Olfr1239	olfactory receptor 1239 [Source:RefSeq peptide;Acc:NP_667181]
	NM_146672	Olfr740	olfactory receptor 740 [Source:RefSeq peptide;Acc:NP_666878]
	NM_146630	Olfr355	olfactory receptor 355 [Source:RefSeq peptide;Acc:NP_666836]
	NM_009510	Ezr	Ezrin (p81)(Cytovillin)(Villin-2) [Source:UniProtKB/Swiss-Prot;Acc:P26040]
	NM_007425	Adrb2	Beta-2 adrenergic receptor (Beta-2 adrenoreceptor)(Beta-2 adrenoceptor) [Source:UniProtKB/Swiss-Prot;Acc:P18762]
	NM_054095	Olfr73	olfactory receptor 73 [Source:RefSeq peptide;Acc:NP_473431]
	NM_016662	Klra1	T-cell surface glycoprotein YE1/48 (T lymphocyte antigen A1)(Lymphocyte antigen 49a)(Ly-49a) [Source:UniProtKB/Swiss-Prot;Acc:P20937]
	NM_008564	Mc1r	Melanocyte-stimulating hormone receptor (MSH-R)(Melanotropin receptor)(Melanocortin receptor 1)(MC1-R) [Source:UniProtKB/Swiss-Prot;Acc:Q01727]
	NM_007814	Cyp2b19	Cytochrome P450 2B19 (EC 1.14.14.1)(CYPIIB19) [Source:UniProtKB/Swiss-Prot;Acc:O55071]
	NM_174990	Gpbar1	G-protein coupled bile acid receptor 1 (Membrane-type receptor for bile acids)(M-BAR) [Source:UniProtKB/Swiss-Prot;Acc:Q80SS6]
	NM_146616	Olfr970	olfactory receptor 970 [Source:RefSeq peptide;Acc:NP_666822]
	NM_008294	AC139379.4	3 beta-hydroxysteroid dehydrogenase type 4 (3 beta-hydroxysteroid dehydrogenase type IV)(3-beta-HSD IV)(NADPH-dependent 3-beta-hydroxy-Delta(5)-steroid dehydrogenase)(EC 1.1.1.-)(3-beta-hydroxy-5-ene steroid dehydrogenase)(Progesterone reductase) [Source:UniProtKB/Swiss-Prot;Acc:Q61767]
	NM_028816	Xpo6	Exportin-6 (Exp6)(Ran-binding protein 20) [Source:UniProtKB/Swiss-Prot;Acc:Q924Z6]
	NM_053135	Pcdhb10	protocadherin beta 10 [Source:RefSeq peptide;Acc:NP_444365]
	NM_207032	Tas2r125	Taste receptor type 2 member 125 (T2R125)(mT2R59) [Source:UniProtKB/Swiss-Prot;Acc:Q7M710]
	NM_020280	Trpm5	Transient receptor potential cation channel subfamily M member 5 (Long transient receptor potential channel 5)(LTrpC5)(MLSN1- and TRP-related gene 1 protein) [Source:UniProtKB/Swiss-Prot;Acc:Q9JJH7]
	NM_173415	Gpr26	Probable G-protein coupled receptor 26 [Source:UniProtKB/Swiss-Prot;Acc:Q8BZA7]
	NM_009854	Cd3g	T-cell surface glycoprotein CD3 gamma chain Precursor (T-cell receptor T3 gamma chain)(CD3g antigen) [Source:UniProtKB/Swiss-Prot;Acc:P11942]
	NM_177002	C730048C13Rik	integral membrane transport protein UST1R [Source:RefSeq peptide;Acc:NP_795976]
	NM_008028	Flot2	Flotillin-2 (Epidermal surface antigen)(ESA) [Source:UniProtKB/Swiss-Prot;Acc:Q60634]
	NM_019491	Olfr71	olfactory receptor 71 [Source:RefSeq peptide;Acc:NP_062359]
	NM_176999	Atp10b	ATPase, class V, type 10B [Source:RefSeq peptide;Acc:NP_795973]
	NM_020270	Scamp5	Secretory carrier-associated membrane protein 5 (Secretory carrier membrane protein 5) [Source:UniProtKB/Swiss-Prot;Acc:Q9JKD3]
	NM_021471	Unc13b	Protein unc-13 homolog B (Munc13-2)(munc13) [Source:UniProtKB/Swiss-Prot;Acc:Q9Z1N9]
	NM_008143	Gnat2	Guanine nucleotide-binding protein G(t) subunit alpha-2 (Transducin alpha-2 chain) [Source:UniProtKB/Swiss-Prot;Acc:P50149]
	NM_019663	Pias1	E3 SUMO-protein ligase PIAS1 (Protein inhibitor of activated STAT protein 1)(DEAD/H box-binding protein 1) [Source:UniProtKB/Swiss-Prot;Acc:O88907]
	NM_178778	A930041I02Rik	UPF0682 protein C9orf126 homolog [Source:UniProtKB/Swiss-Prot;Acc:Q8C8N2]
	NM_183339	Igsf1	Immunoglobulin superfamily member 1 Precursor (Inhibin-binding protein)(InhBP) [Source:UniProtKB/Swiss-Prot;Acc:Q7TQA1]
	NM_008125	Gjb2	Gap junction beta-2 protein (Connexin-26)(Cx26) [Source:UniProtKB/Swiss-Prot;Acc:Q00977]
	NM_001005510	Syne2	synaptic nuclear envelope 2 [Source:RefSeq peptide;Acc:NP_001005510]
	NM_008594	Mfge8	Lactadherin Precursor (Milk fat globule-EGF factor 8)(MFG-E8)(MFGM)(Sperm surface protein SP47)(MP47) [Source:UniProtKB/Swiss-Prot;Acc:P21956]
	NM_146602	Olfr702	olfactory receptor 702 [Source:RefSeq peptide;Acc:NP_666808]
	NM_199226	Rtn4rl2	Reticulon-4 receptor-like 2 Precursor (Nogo-66 receptor homolog 1)(Nogo-66 receptor-related protein 2)(NgR2)(Nogo receptor-like 3) [Source:UniProtKB/Swiss-Prot;Acc:Q7M6Z0]
	NM_207549	V1rd11	vomeronasal 1 receptor, D11 [Source:RefSeq peptide;Acc:NP_997427]
	NM_053126	Pcdhb1	protocadherin beta 1 [Source:RefSeq peptide;Acc:NP_444356]
	NM_146646	Olfr1164	olfactory receptor 1164 [Source:RefSeq peptide;Acc:NP_666852]
	NM_172780	Slc9a6	solute carrier family 9 (sodium/hydrogen exchanger), member 6 [Source:RefSeq peptide;Acc:NP_766368]
	NM_172291	Foxred1	FAD-dependent oxidoreductase domain-containing protein 1 [Source:UniProtKB/Swiss-Prot;Acc:Q3TQB2]
	NM_013706	Cd52	CAMPATH-1 antigen Precursor (Lymphocyte differentiation antigen B7)(CD52 antigen) [Source:UniProtKB/Swiss-Prot;Acc:Q64389]
	NM_019421	Cd320	CD320 antigen Precursor (Transcobalamin receptor)(TCblR)(CD320 antigen) [Source:UniProtKB/Swiss-Prot;Acc:Q9Z1P5]
	NM_146400	Olfr1276	olfactory receptor 1276 [Source:RefSeq peptide;Acc:NP_666507]
	NM_008860	Prkcz	Protein kinase C zeta type (EC 2.7.11.13)(nPKC-zeta) [Source:UniProtKB/Swiss-Prot;Acc:Q02956]
	NM_146883	Olfr30	olfactory receptor 30 [Source:RefSeq peptide;Acc:NP_667089]
	NM_146486	Olfr890	olfactory receptor 890 [Source:RefSeq peptide;Acc:NP_666692]
	NM_009741	Bcl2	Apoptosis regulator Bcl-2 [Source:UniProtKB/Swiss-Prot;Acc:P10417]
	NM_030725	Gpr84	Probable G-protein coupled receptor 84 [Source:UniProtKB/Swiss-Prot;Acc:Q8CIM5]
	NM_009856	Cd6	T-cell differentiation antigen CD6 Precursor (CD6 antigen) [Source:UniProtKB/Swiss-Prot;Acc:Q61003]
signal transducer activity (n=38)
	NM_033218	Ngfr	Tumor necrosis factor receptor superfamily member 16 Precursor (Low-affinity nerve growth factor receptor)(NGF receptor)(Low affinity neurotrophin receptor p75NTR)(CD271 antigen) [Source:UniProtKB/Swiss-Prot;Acc:Q9Z0W1]
	NM_177074	Relt	Tumor necrosis factor receptor superfamily member 19L Precursor [Source:UniProtKB/Swiss-Prot;Acc:Q8BX43]
	NM_010346	Grb10	Growth factor receptor-bound protein 10 (GRB10 adapter protein) [Source:UniProtKB/Swiss-Prot;Acc:Q60760]
	NM_146812	Olfr910	olfactory receptor 910 [Source:RefSeq peptide;Acc:NP_667022]
	NM_146291	Olfr125	olfactory receptor 125 [Source:RefSeq peptide;Acc:NP_666402]
	NM_146543	Olfr11	Olfactory receptor 11 (Olfactory receptor 256-11)(Odorant receptor M49) [Source:UniProtKB/Swiss-Prot;Acc:Q60890]
	NM_013662	Sema5b	Semaphorin-5B Precursor (Semaphorin-G)(Sema G) [Source:UniProtKB/Swiss-Prot;Acc:Q60519]
	NM_134246	V1ri10	vomeronasal 1 receptor, I10 [Source:RefSeq peptide;Acc:NP_599006]
	NM_207538	Mrgprb3	Mas-related G-protein coupled receptor member B3 [Source:UniProtKB/Swiss-Prot;Acc:Q91ZC1]
	NM_146883	Olfr874	olfactory receptor 874 [Source:RefSeq peptide;Acc:NP_667093]
	NM_146366	Olfr1094	Olfactory receptor 1094 (Olfactory receptor 179-7) [Source:UniProtKB/Swiss-Prot;Acc:Q8VF13]
	NM_146971	Olfr1239	olfactory receptor 1239 [Source:RefSeq peptide;Acc:NP_667181]
	NM_146668	Olfr740	olfactory receptor 740 [Source:RefSeq peptide;Acc:NP_666878]
	NM_146626	Olfr355	olfactory receptor 355 [Source:RefSeq peptide;Acc:NP_666836]
	NM_007421	Adrb2	Beta-2 adrenergic receptor (Beta-2 adrenoreceptor)(Beta-2 adrenoceptor) [Source:UniProtKB/Swiss-Prot;Acc:P18762]
	NM_054091	Olfr73	olfactory receptor 73 [Source:RefSeq peptide;Acc:NP_473431]
	NM_016660	Klra1	T-cell surface glycoprotein YE1/48 (T lymphocyte antigen A1)(Lymphocyte antigen 49a)(Ly-49a) [Source:UniProtKB/Swiss-Prot;Acc:P20937]
	NM_173449	4921523A10Rik	PP2C-like domain-containing protein C3orf48 homolog [Source:UniProtKB/Swiss-Prot;Acc:Q8BVT6]
	NM_008560	Mc1r	Melanocyte-stimulating hormone receptor (MSH-R)(Melanotropin receptor)(Melanocortin receptor 1)(MC1-R) [Source:UniProtKB/Swiss-Prot;Acc:Q01727]
	NM_174986	Gpbar1	G-protein coupled bile acid receptor 1 (Membrane-type receptor for bile acids)(M-BAR) [Source:UniProtKB/Swiss-Prot;Acc:Q80SS6]
	NM_146612	Olfr970	olfactory receptor 970 [Source:RefSeq peptide;Acc:NP_666822]
	NM_207028	Tas2r125	Taste receptor type 2 member 125 (T2R125)(mT2R59) [Source:UniProtKB/Swiss-Prot;Acc:Q7M710]
	NM_020278	Trpm5	Transient receptor potential cation channel subfamily M member 5 (Long transient receptor potential channel 5)(LTrpC5)(MLSN1- and TRP-related gene 1 protein) [Source:UniProtKB/Swiss-Prot;Acc:Q9JJH7]
	NM_173411	Gpr26	Probable G-protein coupled receptor 26 [Source:UniProtKB/Swiss-Prot;Acc:Q8BZA7]
	NM_009851	Cd3g	T-cell surface glycoprotein CD3 gamma chain Precursor (T-cell receptor T3 gamma chain)(CD3g antigen) [Source:UniProtKB/Swiss-Prot;Acc:P11942]
	NM_019487	Olfr71	olfactory receptor 71 [Source:RefSeq peptide;Acc:NP_062359]
	NM_021469	Unc13b	Protein unc-13 homolog B (Munc13-2)(munc13) [Source:UniProtKB/Swiss-Prot;Acc:Q9Z1N9]
	NM_008141	Gnat2	Guanine nucleotide-binding protein G(t) subunit alpha-2 (Transducin alpha-2 chain) [Source:UniProtKB/Swiss-Prot;Acc:P50149]
	NM_183336	Igsf1	Immunoglobulin superfamily member 1 Precursor (Inhibin-binding protein)(InhBP) [Source:UniProtKB/Swiss-Prot;Acc:Q7TQA1]
	NM_146598	Olfr702	olfactory receptor 702 [Source:RefSeq peptide;Acc:NP_666808]
	NM_207545	V1rd11	vomeronasal 1 receptor, D11 [Source:RefSeq peptide;Acc:NP_997427]
	NM_199224	Rtn4rl2	Reticulon-4 receptor-like 2 Precursor (Nogo-66 receptor homolog 1)(Nogo-66 receptor-related protein 2)(NgR2)(Nogo receptor-like 3) [Source:UniProtKB/Swiss-Prot;Acc:Q7M6Z0]
	NM_146642	Olfr1164	olfactory receptor 1164 [Source:RefSeq peptide;Acc:NP_666852]
	NM_146396	Olfr1276	olfactory receptor 1276 [Source:RefSeq peptide;Acc:NP_666507]
	NM_146879	Olfr30	olfactory receptor 30 [Source:RefSeq peptide;Acc:NP_667089]
	NM_146482	Olfr890	olfactory receptor 890 [Source:RefSeq peptide;Acc:NP_666692]
	NM_030721	Gpr84	Probable G-protein coupled receptor 84 [Source:UniProtKB/Swiss-Prot;Acc:Q8CIM5]
	NM_009853	Cd6	T-cell differentiation antigen CD6 Precursor (CD6 antigen) [Source:UniProtKB/Swiss-Prot;Acc:Q61003]
